# Supplementary material for: CO2-Activation by size-selected tantalum cluster cations (Ta1–16+): thermalization governing reaction selectivity
Source: Royal Society of Chemistry journal article supplement (doi:10.1039/d1cp04469a), 2022-01-01
Supplement: d1cp04469a1.pdf [file d1cp04469a1.pdf]

## Electronic supplementary information (ESI)

### CO<sub>2</sub>-activation by size-selected tantalum cluster cations (Ta<sub>1–16</sub><sup>+</sup>): thermalization governing reaction selectivity

Nikita Levin,<sup>a</sup> Johannes T. Margraf,<sup>b,c</sup> Jozef Lengyel,<sup>a</sup> Karsten Reuter,<sup>b,c</sup> Martin Tschurl,<sup>\*a</sup> and  
Ulrich Heiz<sup>a</sup>

a *Lehrstuhl für Physikalische Chemie, Chemistry Department & Catalysis Research Center,  
Technische Universität München, Lichtenbergstraße 4, 85748 Garching, Germany.  
E-mail: tschurl@tum.de*

b *Lehrstuhl für Theoretische Chemie, Chemistry Department & Catalysis Research Center,  
Technische Universität München, Lichtenbergstraße 4, 85748 Garching, Germany.*

c *Fritz-Haber-Institut der Max-Planck-Gesellschaft, Faradayweg 4-6, D-14195 Berlin, Germany*

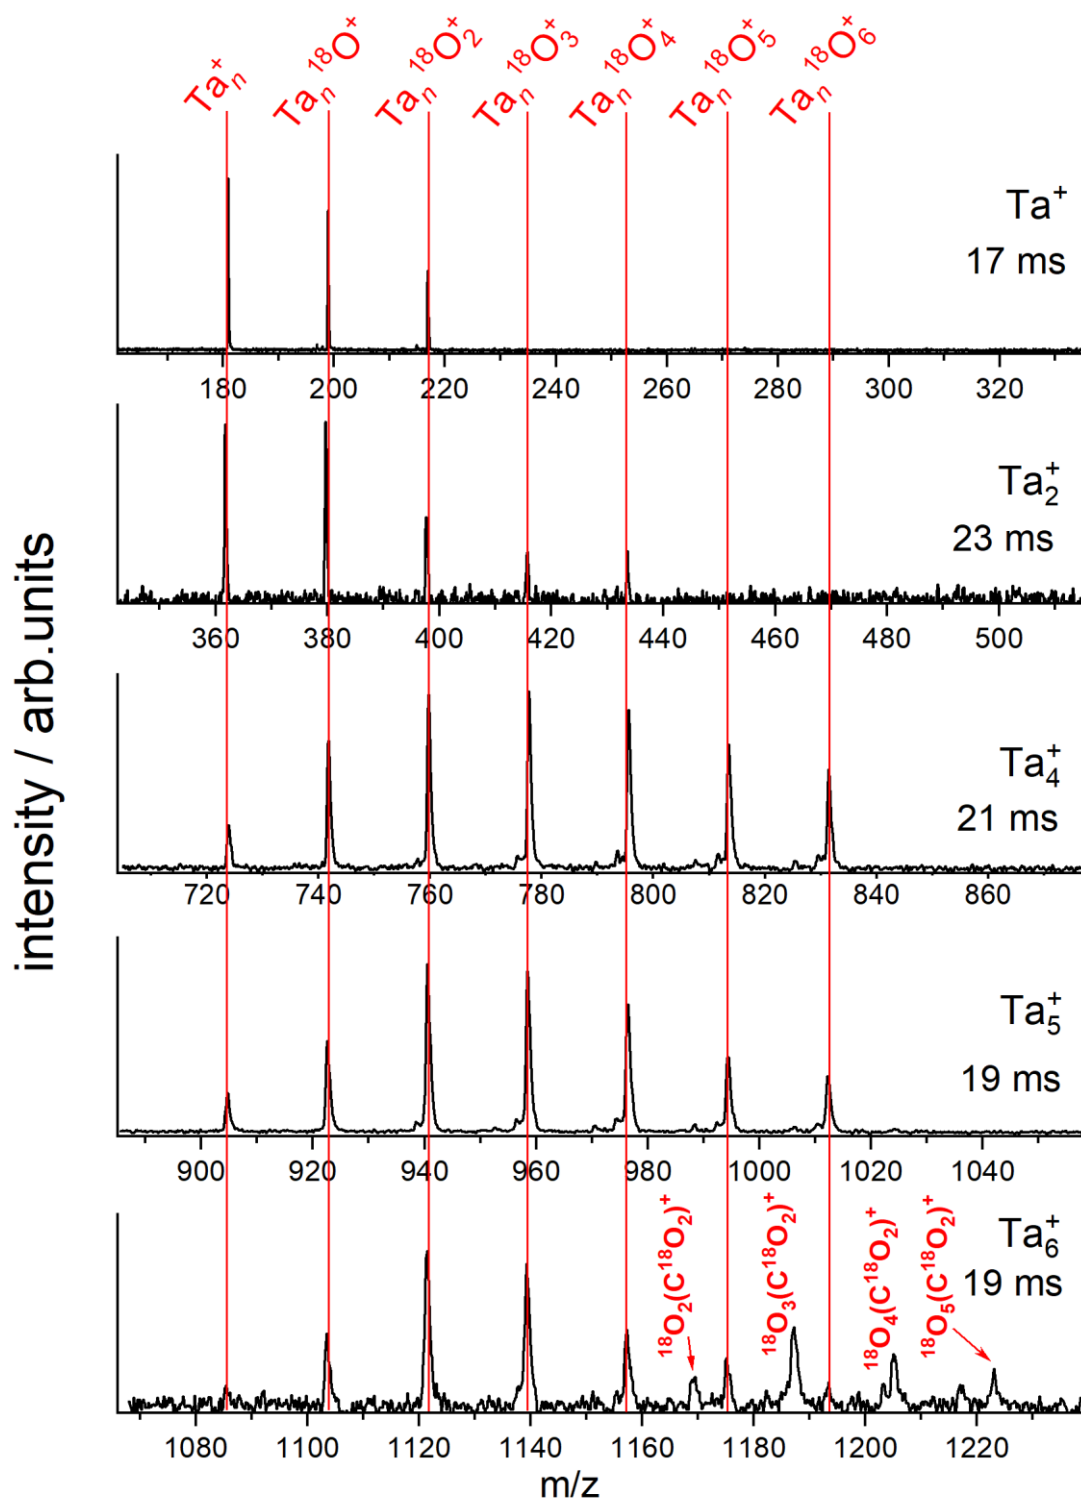

**Fig. S1** Mass spectra of size-selected  $\text{Ta}_n^+$ -clusters ( $n = 1-6$ ) and the corresponding products of their reaction with  $\text{C}^{18}\text{O}_2$  after being stored in the ion trap for 29 ms. The total pressure in the trap amounts to 0.82 Pa, with the partial pressure of carbon dioxide being 20 ppm.

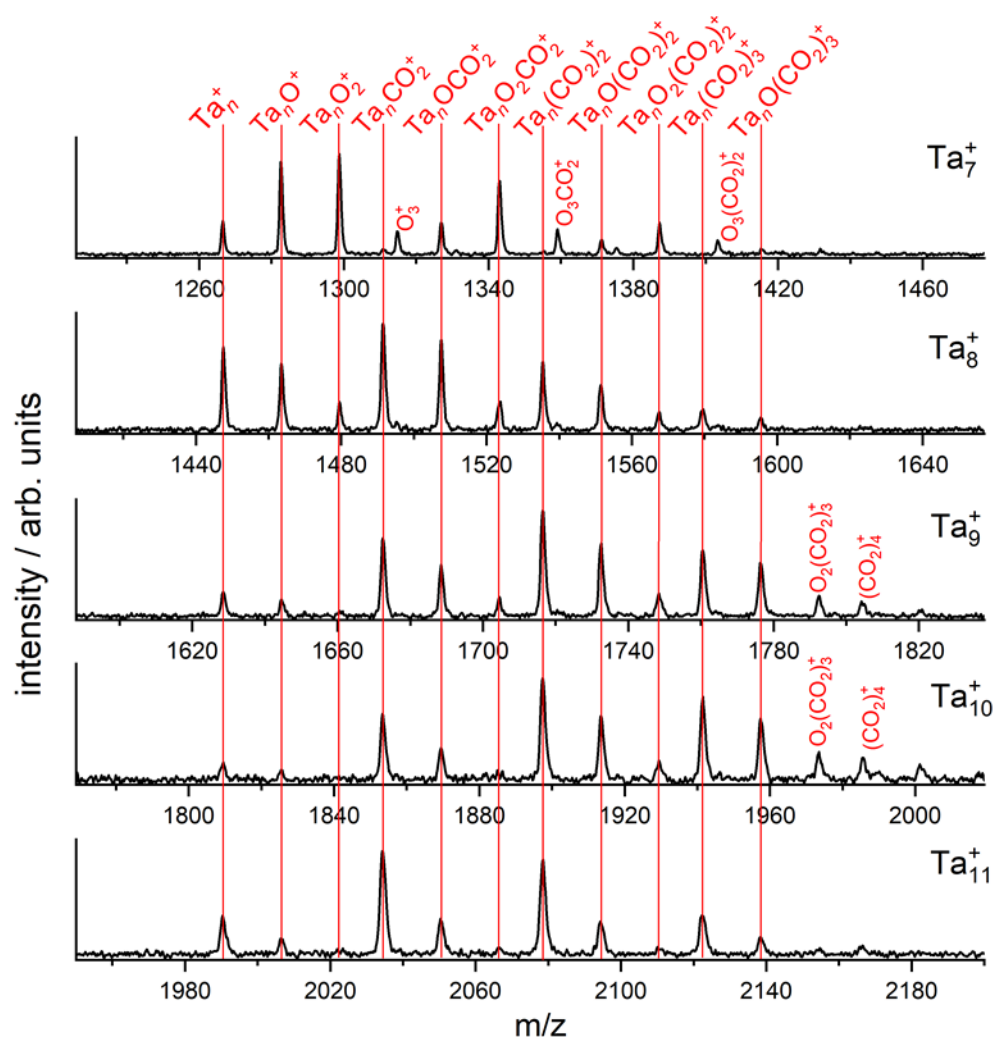

**Fig. S2** Mass spectra of size-selected  $\text{Ta}_n^+$ -clusters ( $n = 7-11$ ) and the corresponding products of their reaction with  $\text{CO}_2$  after being stored in the ion trap for 29 ms (for  $\text{Ta}_{7-10}^+$ ) and 21 ms (for  $\text{Ta}_{11}^+$ ), respectively. For these cluster sizes both pathways, the oxygen atom transfer and the adsorption of an entire molecule, occur already in the reaction with the first  $\text{CO}_2$  molecule. The total pressure in the trap amounts to 0.82 Pa, with the partial pressure of carbon dioxide being 10 ppm.

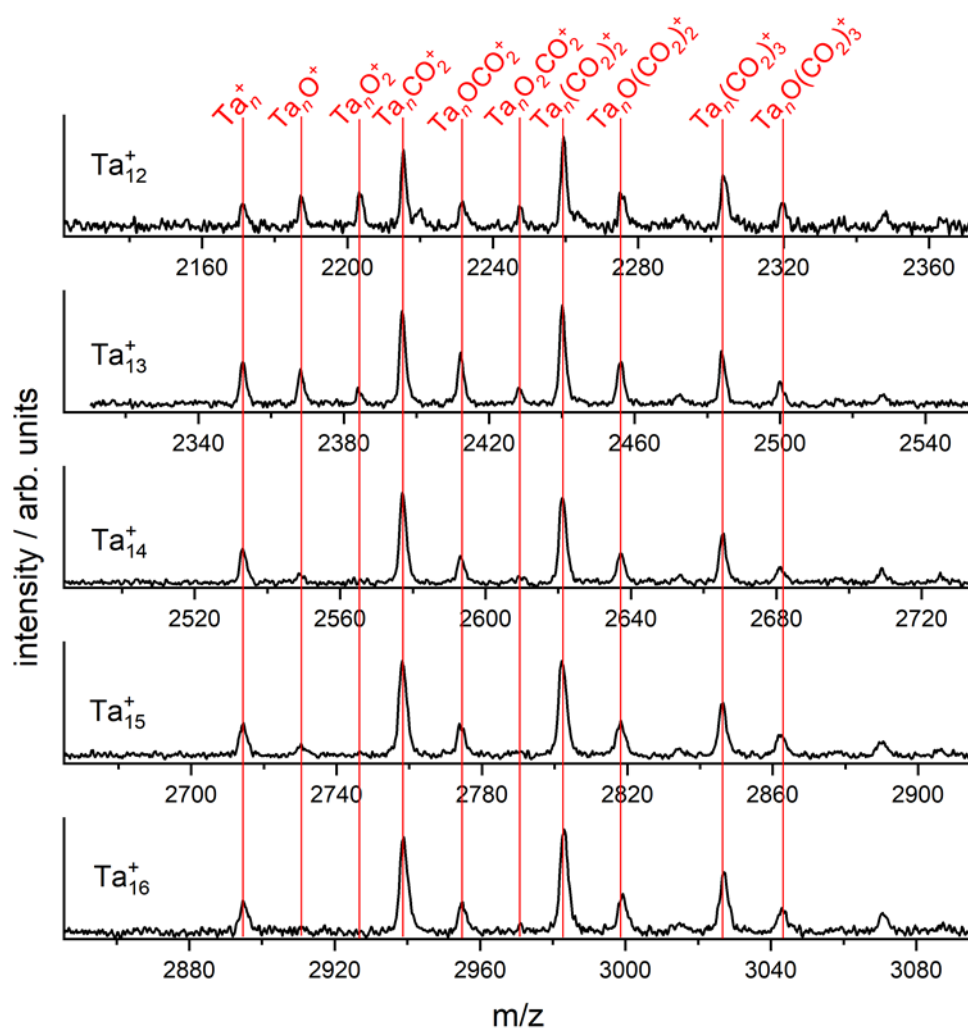

**Fig. S3** Mass spectra of size-selected Ta<sub>n</sub><sup>+</sup>-clusters ( $n = 12-16$ ) and the corresponding products of their reaction with CO<sub>2</sub> after being stored in the ion trap for 21 ms (for Ta<sub>12</sub><sup>+</sup>) and 17 ms (for Ta<sub>13-16</sub><sup>+</sup>), respectively. All cluster exhibit predominantly the adsorption of an entire molecule in all reaction steps, while the oxygen atom transfer only represents a secondary reaction pathway. The total pressure in the trap amounts to 0.82 Pa, with the partial pressure of carbon dioxide being 10 ppm.

**Tab. S1** Bimolecular rate coefficients  $k^{(2)}$  in units of  $10^{-8} \text{ cm}^3 \text{ s}^{-1}$  of the consecutive  $\text{CO}_2$ -decarbonylation and  $\text{CO}_2$  adsorption reactions by  $\text{Ta}_n^+$  ( $n = 1-6$ ) and  $\text{Ta}_6\text{OCO}_2^+$ . For each reaction an average value of two or more measurements is presented with error bars reflecting corresponding statistical uncertainties. Fraction of  $\text{CO}_2$  in buffer gas varies between 10 and 25 ppm, the total pressure in the trap is 0.82 Pa.

| Product                         | $\text{Ta}_1^+$ | $\text{Ta}_2^+$ | $\text{Ta}_3^+$ | $\text{Ta}_4^+$ | $\text{Ta}_5^+$ | $\text{Ta}_6^+$ | $\text{Ta}_6\text{OCO}_2^+$ |
|---------------------------------|-----------------|-----------------|-----------------|-----------------|-----------------|-----------------|-----------------------------|
| +O                              | $1.1 \pm 0.1$   | $1.6 \pm 0.2$   | $2.7 \pm 0.1$   | $3.3 \pm 0.3$   | $3.7 \pm 0.4$   | $5.4 \pm 1.3$   | $2.2 \pm 0.1$               |
| +O <sub>2</sub>                 | $1.1 \pm 0.1$   | $1.9 \pm 0.3$   | $3.2 \pm 0.03$  | $3.2 \pm 0.3$   | $4.0 \pm 0.3$   | $4.5 \pm 1.0$   | $3.7 \pm 0.6$               |
| +OCO <sub>2</sub>               | ---             | ---             | ---             | ---             | ---             | <0.1            | $2.8 \pm 0.8$               |
| +O <sub>3</sub>                 | ---             | $3.2 \pm 0.3$   | $3.5 \pm 0.2$   | $3.8 \pm 0.4$   | $3.6 \pm 0.2$   | $4.0 \pm 0.8$   | $5.1 \pm 1.4$               |
| +O <sub>2</sub> CO <sub>2</sub> | ---             | ---             | ---             | ---             | ---             | $0.5 \pm 0.2$   | $0.4 \pm 0.3$               |
| +O <sub>4</sub>                 | ---             | $3.8 \pm 0.3$   | $3.9 \pm 0.1$   | $4.0 \pm 0.5$   | $4.0 \pm 0.3$   | $3.0 \pm 0.8$   | $3.3 \pm 0.3$               |
| +O <sub>3</sub> CO <sub>2</sub> | ---             | ---             | ---             | ---             | ---             | $2.4 \pm 0.8$   | 0.5                         |
| +O <sub>5</sub>                 | ---             | ---             | $4.2 \pm 0.4$   | $3.6 \pm 0.5$   | $4.0 \pm 0.3$   | $3.4 \pm 2.2$   | $0.5 \pm 0.2$               |
| +O <sub>4</sub> CO <sub>2</sub> | ---             | ---             | ---             | ---             | ---             | $3.6 \pm 1.5$   | ---                         |
| +O <sub>6</sub>                 | ---             | ---             | $3.3 \pm 0.6$   | $3.2 \pm 0.5$   | $3.8 \pm 0.5$   | $3.8 \pm 2.1$   | ---                         |
| +O <sub>5</sub> CO <sub>2</sub> | ---             | ---             | ---             | ---             | ---             | $1.4 \pm 1.0$   | ---                         |
| +O <sub>7</sub>                 | ---             | ---             | ---             | ---             | $0.08 \pm 0.05$ | $4.1 \pm 0.7$   | ---                         |
| +O <sub>6</sub> CO <sub>2</sub> | ---             | ---             | ---             | ---             | <0.1            | ---             | ---                         |
| +O <sub>8</sub>                 | ---             | ---             | ---             | ---             | ---             | $2.6 \pm 0.3$   | ---                         |
| +O <sub>9</sub>                 | ---             | ---             | ---             | ---             | ---             | $3.2 \pm 0.6$   | ---                         |

**Tab. S2** Bimolecular rate coefficients  $k^{(2)}$  in units of  $10^{-8} \text{ cm}^3 \text{ s}^{-1}$  of the majority of consecutive  $\text{CO}_2$ -decarbonylation and  $\text{CO}_2$  adsorption reactions by  $\text{Ta}_n^+$  ( $n = 7,8$ ). For each reaction an average value of two or more measurements is presented with error bars reflecting corresponding statistical uncertainties. Fraction of  $\text{CO}_2$  in buffer gas varies between 10 and 25 ppm, the total pressure in the trap is 0.82 Pa.

| Product                   | $\text{Ta}_7^+$ | $\text{Ta}_7\text{CO}_2^+$ | $\text{Ta}_7(\text{CO}_2)_2^+$ | $\text{Ta}_8^+$ | $\text{Ta}_8\text{CO}_2^+$ | $\text{Ta}_8(\text{CO}_2)_2^+$ |
|---------------------------|-----------------|----------------------------|--------------------------------|-----------------|----------------------------|--------------------------------|
| +O                        | $5.2 \pm 3.3$   | $6.2 \pm 3.9$              | ---                            | $1.4 \pm 0.9$   | $2.6 \pm 0.8$              | $0.9 \pm 0.6$                  |
| + $\text{CO}_2$           | $0.8 \pm 0.7$   | $2.9 \pm 0.9$              | ---                            | $3.5 \pm 2.5$   | $3.0 \pm 1.2$              | $3.5 \pm 1.1$                  |
| + $\text{O}_2$            | $4.4 \pm 1.6$   | ---                        | ---                            | $2.2 \pm 0.3$   | $2.3 \pm 1.4$              | $2.2 \pm 0.6$                  |
| + $\text{OCO}_2$          | $1.7 \pm 0.7$   | $3.9 \pm 1.7$              | $5.0 \pm 1.5$                  | $3.7 \pm 1.5$   | $3.7 \pm 0.7$              | $2.0 \pm 0.6$                  |
| + $\text{O}_3$            | $1.7 \pm 0.5$   | $1.3 \pm 0.9$              | $0.8 \pm 0.2$                  | ---             | $3.3 \pm 2.1$              | $1.8 \pm 0.7$                  |
| + $\text{O}_2\text{CO}_2$ | $4.0 \pm 2.2$   | $3.5 \pm 1.1$              | $1.5 \pm 0.7$                  | $6.4 \pm 2.7$   | $4.5 \pm 0.6$              | $3.6 \pm 0.3$                  |
| + $\text{O}_4$            | ---             | $2.9 \pm 1.8$              | $0.6 \pm 0.4$                  | ---             | ---                        | $1.9 \pm 0.3$                  |
| + $\text{O}_3\text{CO}_2$ | $8.2 \pm 4.5$   | $5.0 \pm 1.5$              | $3.2 \pm 2.5$                  | ---             | $13.1 \pm 3.8$             | ---                            |
| + $\text{O}_5$            | ---             | $5.4 \pm 0.1$              | $1.5 \pm 1.3$                  | ---             | ---                        | ---                            |
| + $\text{O}_4\text{CO}_2$ | ---             | $6.8 \pm 3.7$              | $2.0 \pm 0.8$                  | ---             | ---                        | ---                            |
| + $\text{O}_5\text{CO}_2$ | ---             | $3.4 \pm 0.6$              | ---                            | ---             | ---                        | ---                            |

**Tab. S3** Bimolecular rate coefficients  $k^{(2)}$  in units of  $10^{-8} \text{ cm}^3 \text{ s}^{-1}$  of the first couple of consecutive  $\text{CO}_2$ -decarbonylation and  $\text{CO}_2$  adsorption reactions by  $\text{Ta}_n^+$  ( $n = 9,10$ ). For each reaction an average value of two or more measurements is presented with error bars reflecting corresponding statistical uncertainties. Fraction of  $\text{CO}_2$  in buffer gas varies between 10 and 25 ppm, the total pressure in the trap is 0.82 Pa.

| Product                   | $\text{Ta}_9^+$ | $\text{Ta}_9\text{CO}_2^+$ | $\text{Ta}_9(\text{CO}_2)_2^+$ | $\text{Ta}_{10}^+$ | $\text{Ta}_{10}\text{CO}_2^+$ | $\text{Ta}_{10}(\text{CO}_2)_2^+$ |
|---------------------------|-----------------|----------------------------|--------------------------------|--------------------|-------------------------------|-----------------------------------|
| +O                        | $0.5 \pm 0.4$   | $1.1 \pm 0.1$              | $1.0 \pm 0.1$                  | $0.6 \pm 0.4$      | $2.1 \pm 0.4$                 | $1.1 \pm 0.5$                     |
| + $\text{CO}_2$           | $5.9 \pm 3.1$   | $3.1 \pm 0.1$              | $2.6 \pm 0.01$                 | $7.3 \pm 2.7$      | $5.1 \pm 0.8$                 | $3.2 \pm 0.4$                     |
| + $\text{O}_2$            | ---             | $1.7 \pm 0.5$              | $0.5 \pm 0.4$                  | ---                | ---                           | $3.0 \pm 0.1$                     |
| + $\text{OCO}_2$          | $5.2 \pm 1.7$   | $3.8 \pm 0.7$              | $2.7 \pm 0.1$                  | $9.7 \pm 3.1$      | $11.5 \pm 1.8$                | $3.1 \pm 1.2$                     |
| + $\text{O}_2\text{CO}_2$ | ---             | $9.0 \pm 4.1$              | $5.4 \pm 0.2$                  | ---                | ---                           | $10.3 \pm 5.1$                    |

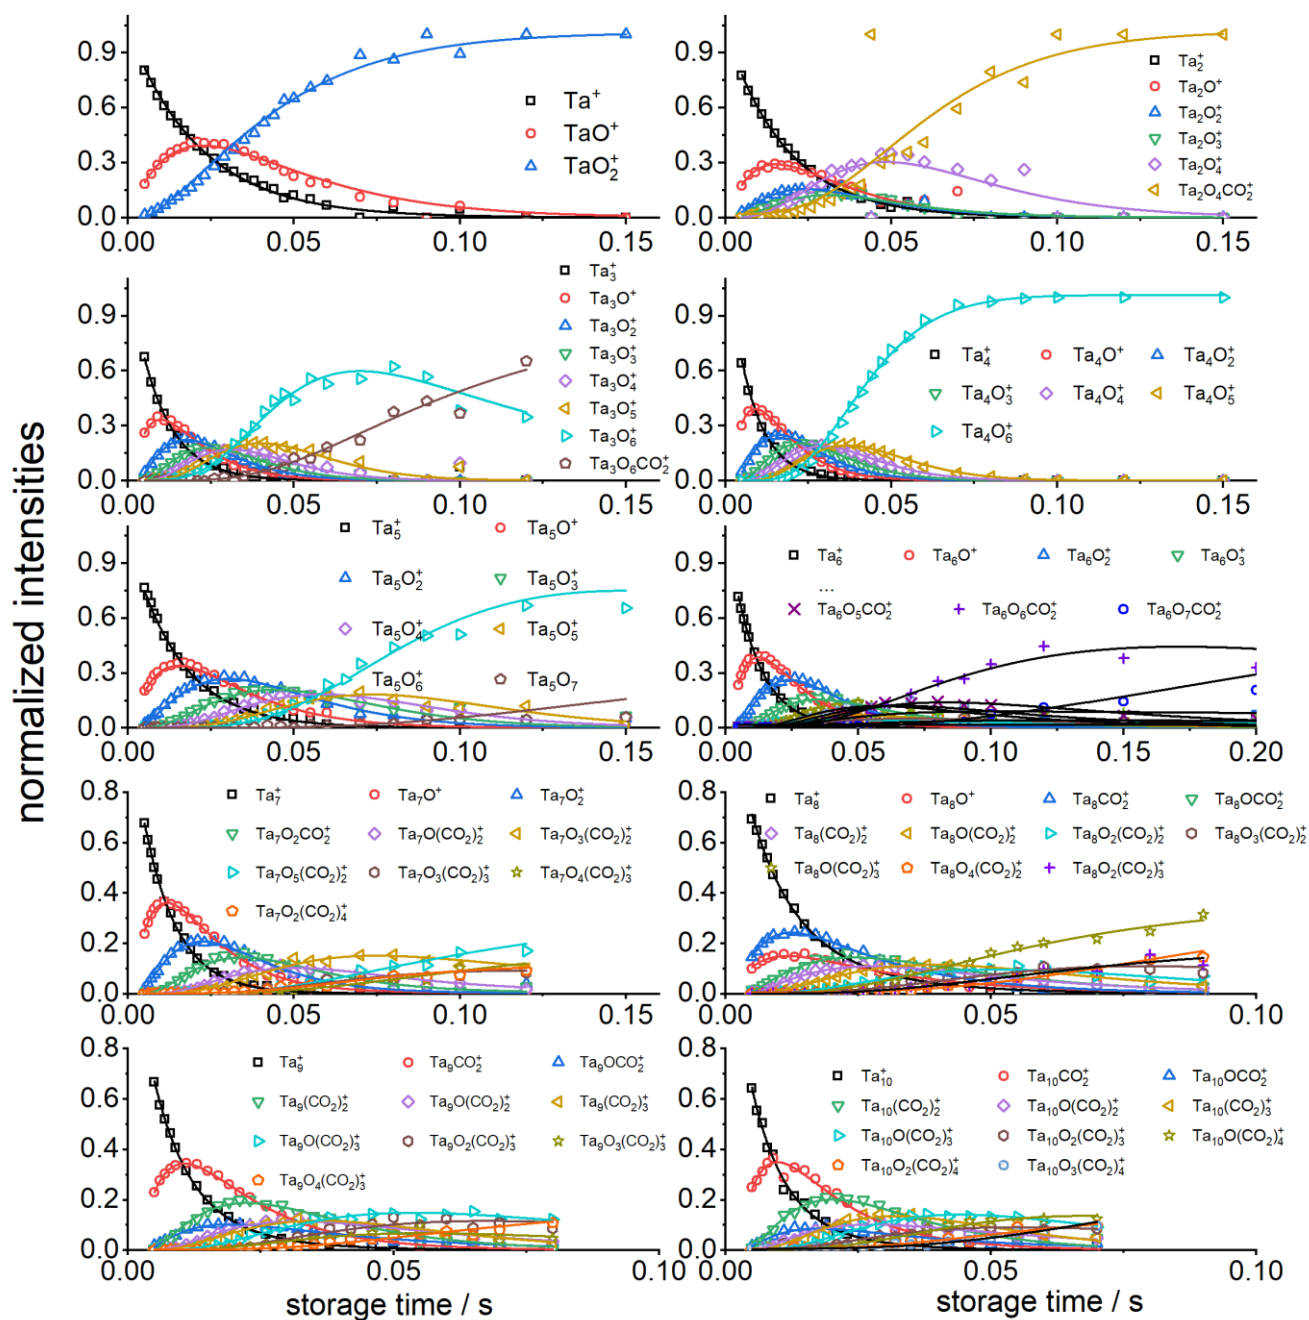

**Fig. S4** Kinetic modeling of the reactions between  $Ta_{1-10}^{+}$  and  $CO_2$ . For the reactions of  $Ta_{6-10}^{+}$ , only the most abundant species are displayed.

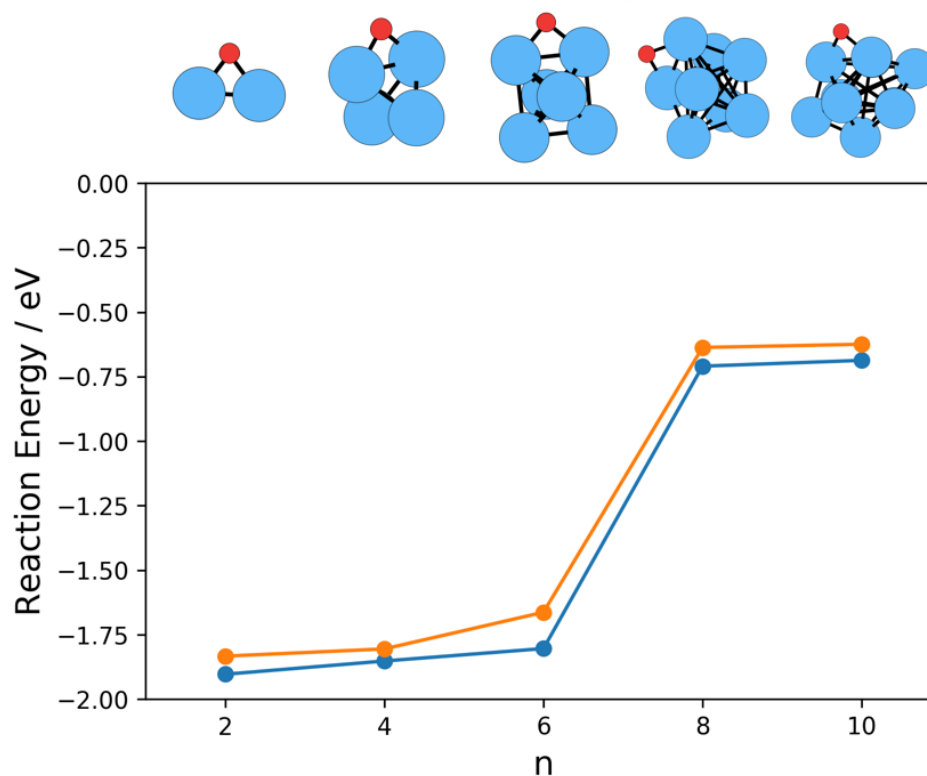

**Fig. S5** Calculated reaction energies for the oxygen atom transfer from  $\text{CO}_2$  to  $\text{Ta}_n^+$ -clusters (with  $n = 2, 4, 6, 8, 10$ ) including (blue) and excluding (orange) the zero-point vibrational energy. The corresponding optimized geometries of  $\text{Ta}_n\text{O}^+$  are also shown.

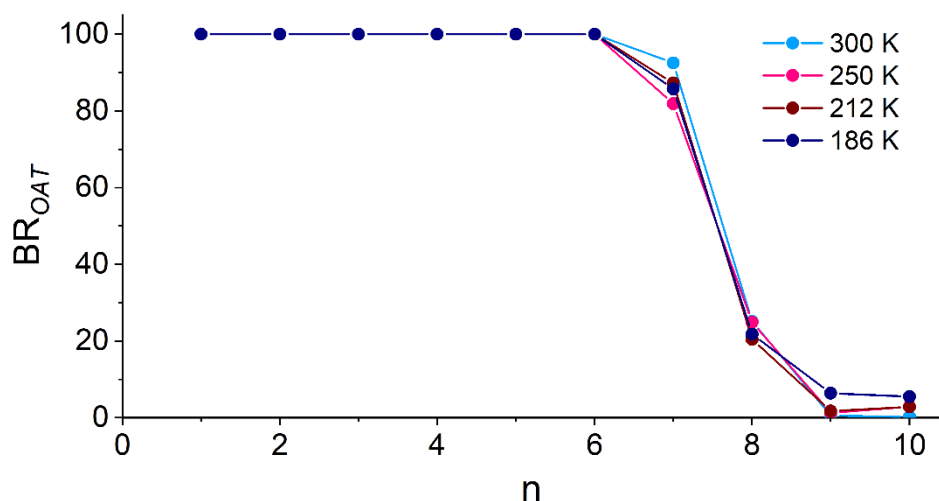

**Fig. S6** Branching ratio toward the oxygen atom transfer ( $\text{BR}_{\text{OAT}}$ ) for  $\text{Ta}_n^+$  ( $n = 1-10$ ) in the reaction with the first  $\text{CO}_2$  molecule. As the exothermicity of the reaction is significantly higher than the changes in energy caused by variations of the temperature, the  $\text{BR}_{\text{OAT}}$  remain constant within the error of the measurement for all temperatures. All measurements were performed at a total pressure in the trap of 0.82 Pa, with the partial pressure of carbon dioxide being 10 ppm.
